# Supplementary material for: Outcome from 5-year live surgical demonstrations in urinary stone treatment: are outcomes compromised?
Source: World J Urol. 2017 May 18;35(11):1745–56. doi: 10.1007/s00345-017-2050-4 (PMC5649595; doi:10.1007/s00345-017-2050-4)
Supplement: Supplementary file 1 — Supplementary material 1 (DOCX 20 kb) [file 345_2017_2050_MOESM1_ESM.docx]

**Supplementary material**

Table 2. Multiple logistic and linear regression models for the association of live surgical demonstrations with outcomes.

| URS | univariate coeff [CI] | p-value | Multiple regression coeff [CI] | p-value |
| --- | --- | --- | --- | --- |
| Intra-operative complications | -0.260 [0.22-2.74] | 0.687 | 0.029 [0.26-4.03] | 0.967 |
| Postoperative complications | 0.502 [0.86-3.17] | 0.132 | 0.418 [0.75-3.06] | 0.242 |
| High grade complications  >Clavien grade II | -0.659 [0.10-2.65] | 0.429 | -0.186 [0.15-4.74] | 0.830 |
| Length of hospital stay | -0.137 [0.50-1.51] | 0.762 | - | - |
| Stone-free rates | -0.204 [0.52-1.29] | 0.385 | 0.414 [0.90-2.55] | 0.119 |
| Retreatment rates | 0.634 [1.06-3.35] | 0.031 | 0.087 [0.57-2.09] | 0.793 |
| Operation time* | 0.241 [0.11-0.38] | <0.001 | -0.006 [-0.13-0.12] | 0.923 |
| PNL | **univariate coeff [CI]** | **p-value** | **Multiple regression coeff [CI]** | **p-value** |
| Intra-operative complications | 0.511 [0.51-5.50] | 0.402 | 0.666 [0.53-7.15] | 0.316 |
| Postoperative complications | -0.294 [0.38-1.48] | 0.401 | -0.456 [0.30-1.32] | 0.225 |
| High grade complications  >Clavien grade II | -1.190 [0.085-1.09] | 0.068 | -0.843 [0.11-1.73] | 0.234 |
| Length of hospital stay | 0.127 [0.55-2.34] | 0.731 | - | - |
| Stone-free rates | 0.470 [0.83-3.09] | 0.162 | 0.297 [0.66-2.73] | 0.410 |
| Retreatment rates | -0.512 [0.295-1.218] | 0.157 | -0.586 [0.26-1.20] | 0.135 |
| Operation time* | 0.070 [-0.061-0.20] | 0.292 | 0.052 [-0.077-0.18] | 0.428 |

coeff: regression coefficient, CI: 95% confidence interval. Length of hospital stay is not adjusted for confounders in a multiple linear regression analysis. The URS group variables were adjusted for renal anomalies, stone burden and difference in stone location. The PNL group variables were adjusted for stone burden. *logistic transformation. Length of hospital stay was dichotomized for URS longer or shorter than one day and for PNL longer or shorter than four days.

**Additional information**

Article title: Outcome from five-year Live Surgical Demonstrations in urinary stone treatment:

are outcomes compromised?

Journal name: World Journal of Urology

Author names: Jaap D Legematea,*,§, Stefano P Zanettib*, Joyce Baarda, Guido M Kamphuisa, Emanuele Montanarib, Olivier Traxerc, Jean JMCH de la Rosettea

aDepartment of Urology, AMC University Hospital, Amsterdam, the Netherlands

bDepartment of Urology, IRCCS Ca’ Granda Ospedale Maggiore Policlinico, University of Milan, Italy

cDepartment of Urology, Tenon Hospital, University Pierre et Marie Curie, Paris, France

*Both authors contributed equally to this study. § Corresponding author:

Jaap D Legemate, M.D.

Department of Urology

AMC University Hospital

Meibergdreef 9

1105 AZ Amsterdam Z-O, The Netherlands

Tel: +31-20-5664377, Fax: +31-20-5669585

E-mail: [j.d.legemate@amc.uva.nl](mailto:j.d.legemate@amc.uva.nl)
